# Supplementary material for: The Greenhouse Phyllosphere Microbiome and Associations with Introduced Bumblebees and Predatory Mites
Source: PubMed Central journal article supplement (PMC9431046; doi:10.1128/spectrum.01755-22), 2022-07-07
Supplement: reviewer-comments.pdf [file reviewer-comments.pdf]

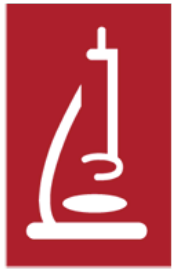

AMERICAN  
SOCIETY FOR  
MICROBIOLOGY

# Microbiology Spectrum

## the greenhouse phyllosphere microbiome and associations with introduced bumblebees and predatory mites

Marie Legein, Wenke Smets, Karen Wuyts, Lien Bosmans, Roeland Samson, and Sarah Lebeer

*Corresponding Author(s): Sarah Lebeer, University of Antwerp*

---

### Review Timeline:

|                     |               |
|---------------------|---------------|
| Submission Date:    | May 16, 2022  |
| Editorial Decision: | May 22, 2022  |
| Revision Received:  | June 13, 2022 |
| Accepted:           | June 17, 2022 |

---

*Editor: Kristen DeAngelis*

*Reviewer(s): The reviewers have opted to remain anonymous.*

### Transaction Report:

(Note: With the exception of the correction of typographical or spelling errors that could be a source of ambiguity, letters and reports are not edited. The original formatting of letters and referee reports may not be reflected in this compilation.)

**DOI:** <https://doi.org/10.1128/spectrum.01755-22>

May 22, 2022

Prof. Sarah Lebeer  
University of Antwerp  
Bioscience Engineering  
Groenenborgerlaan 171  
Antwerpen 2020  
Belgium

Re: Spectrum01755-22 (The impact of introduced bumblebees and predatory mites on the phyllosphere microbiome of greenhouse crops)

Dear Prof. Sarah Lebeer:

Thank you for submitting your manuscript to Microbiology Spectrum. I think this could be a good contribution to our journal, but I agree with the editor from mSystems that the hypothesis is not a good match to the experimental design, results and discussion. I would like for you to revise your manuscript and make a point-by-point rebuttal of the previous editors comments, including addressing the caveats to the study in the discussion.

When submitting the revised version of your paper, please provide (1) point-by-point responses to the issues raised by the reviewers as file type "Response to Reviewers," not in your cover letter, and (2) a PDF file that indicates the changes from the original submission (by highlighting or underlining the changes) as file type "Marked Up Manuscript - For Review Only". Please use this link to submit your revised manuscript - we strongly recommend that you submit your paper within the next 60 days or reach out to me. Detailed instructions on submitting your revised paper are below.

Link Not Available

Below you will find instructions from the Microbiology Spectrum editorial office and comments generated during the review.

ASM policy requires that data be available to the public upon online posting of the article, so please verify all links to sequence records, if present, and make sure that each number retrieves the full record of the data. If a new accession number is not linked or a link is broken, provide production staff with the correct URL for the record. If the accession numbers for new data are not publicly accessible before the expected online posting of the article, publication of your article may be delayed; please contact the ASM production staff immediately with the expected release date.

The ASM Journals program strives for constant improvement in our submission and publication process. Please tell us how we can improve your experience by taking this quick [Author Survey](#).

Sincerely,

Kristen DeAngelis

Editor, Microbiology Spectrum

Journals Department  
American Society for Microbiology  
1752 N St., NW  
Washington, DC 20036  
E-mail: [spectrum@asmusa.org](mailto:spectrum@asmusa.org)

Reviewer comments:

Staff Comments:

### **Preparing Revision Guidelines**

To submit your modified manuscript, log onto the eJP submission site at <https://spectrum.msubmit.net/cgi-bin/main.plex>. Go to

Author Tasks and click the appropriate manuscript title to begin the revision process. The information that you entered when you first submitted the paper will be displayed. Please update the information as necessary. Here are a few examples of required updates that authors must address:

- Point-by-point responses to the issues raised by the reviewers in a file named "Response to Reviewers," NOT IN YOUR COVER LETTER.
- Upload a compare copy of the manuscript (without figures) as a "Marked-Up Manuscript" file.
- Each figure must be uploaded as a separate file, and any multipanel figures must be assembled into one file.
- Manuscript: A .DOC version of the revised manuscript
- Figures: Editable, high-resolution, individual figure files are required at revision, TIFF or EPS files are preferred

For complete guidelines on revision requirements, please see the journal Submission and Review Process requirements at <https://journals.asm.org/journal/Spectrum/submission-review-process>. **Submissions of a paper that does not conform to Microbiology Spectrum guidelines will delay acceptance of your manuscript. "**

Please return the manuscript within 60 days; if you cannot complete the modification within this time period, please contact me. If you do not wish to modify the manuscript and prefer to submit it to another journal, please notify me of your decision immediately so that the manuscript may be formally withdrawn from consideration by Microbiology Spectrum.

If your manuscript is accepted for publication, you will be contacted separately about payment when the proofs are issued; please follow the instructions in that e-mail. Arrangements for payment must be made before your article is published. For a complete list of **Publication Fees**, including supplemental material costs, please visit our [website](#).

Corresponding authors may [join or renew ASM membership](#) to obtain discounts on publication fees. Need to upgrade your membership level? Please contact Customer Service at [Service@asmusa.org](mailto:Service@asmusa.org).

Thank you for submitting your paper to Microbiology Spectrum.

## Response to Reviewers

Decision letter Spectrum01755-22 on 23/05/2022

Thank you for submitting your manuscript to Microbiology Spectrum. I think this could be a good contribution to our journal, but I agree with the editor from mSystems that the hypothesis is not a good match to the experimental design, results and discussion. I would like for you to revise your manuscript and make a point-by-point rebuttal of the previous editors comments, including addressing the caveats to the study in the discussion.

Authors: Dear editor, Thank you for giving us the chance to adapt our manuscript. Please find below a point-by-point rebuttal of the previous editors comments. We have also adapted the manuscript and addressed the caveats of the study in the discussion. Important changes have been highlighted in the Marked-Up manuscript.

Decision letter mSystems00384-22 on 27/04/2022

The paper was reviewed internally by 3 experts who felt that the experimental design fell short of being able to test the primary hypothesis as presented.

This is very good idea which suffers from a poor experimental planning. The main problem is the lack of untreated plants. Likewise, it is unclear whether the titre of insects was the same for the different crops and/or in the various departments (or was quantified at all) as this will likely impact on what is the "input" microbiota. As the plant genotype is a determinant of the microbiota, you could have quantified its impact on the mite/insect effect. The results seem slightly descriptive, but have the potential to systematically dissect how these insect might alter the phyllosphere microbiome. However, without sampling plants before adding the insects, you cannot quite tell if part of the plant microbiome might originate from insect (which was assayed before adding these to the plants).

### **Point-by-point rebuttal**

The paper was reviewed internally by 3 experts who felt that the experimental design fell short of being able to test the primary hypothesis as presented.

Authors: We agree with the reviewer and want to clarify that the study started as an observational study and was not designed to test this hypothesis. We have adapted the abstract, which now describes the study better as an observational and explorative study and removed that a specific hypothesis was tested.

This is very good idea which suffers from a poor experimental planning. The main problem is the lack of untreated plants.

Authors: Indeed, we agree that this study lacks a control group. Since this was an observational study done in greenhouses in which different cultivars were tested and where the yield was destined for the commercial market, there was no option to

change the management of these greenhouses. Nevertheless, even without this control, we could make sufficient relevant conclusions based on other comparisons, mostly on the impact of bumblebees, which is discussed on Ln 239-248. For the impact of predatory mites, we agree that some more nuance was needed, as discussed now on Ln 275 -288. Finally, we added a concluding alinea (Ln 304-314) which highlights the caveats of the study.

Likewise, it is unclear whether the titre of insects was the same for the different crops and/or in the various departments (or was quantified at all) as this will likely impact on what is the "input" microbiota.

Authors: This was indeed not quantified, because of practical considerations, it was not possible to control for and measure this. This limitation of the study design is now made more clear in the introduction (Ln 72-74) and the results section (Ln 139 – 146 and Ln 168-170). Nevertheless, even with taken this bias into account, the conclusion that specific taxa were introduced in the greenhouses by bumblebees is still valid

As the plant genotype is a determinant of the microbiota, you could have quantified its impact on the mite/insect effect.

Authors: The reviewer also made a valid point that plant genotype is important. However, all plants used here were commercial cultivars, postulated to have a similar genotype (strawberries vs tomatoes), so that this impact is postulated to be minor. Moreover, to quantify the differences between strawberry and tomato, a more controlled introduction of beneficial arthropods would be needed.

The results seem slightly descriptive, but have the potential to systematically dissect how these insect might alter the phyllosphere microbiome. However, without sampling plants before adding the insects, you cannot quite tell if part of the plant microbiome might originate from insect (which was assayed before adding these to the plants).

Authors: We agree with the reviewer that due to the lack of a control group, we need to remain descriptive. Yet, some interesting novel observations were obtained, such as the transfer of *Gilliamella* and *Snodgrassella* from bumblebees to tomato plants, the presence of *Portiera* in whitefly infested departments, and the presence of typical phyllosphere-associated bacteria on predatory mites. These observations are worth communicating about, because they inspire novel research. Novel experiments should best be performed in more controlled/experiment environments, outside commercial greenhouses as we did, because the need for more controls.

June 17, 2022

Prof. Sarah Lebeer  
University of Antwerp  
Bioscience Engineering  
Groenenborgerlaan 171  
Antwerpen 2020  
Belgium

Re: Spectrum01755-22R1 (the greenhouse phyllosphere microbiome and associations with introduced bumblebees and predatory mites)

Dear Prof. Sarah Lebeer:

Your manuscript has been accepted, and I am forwarding it to the ASM Journals Department for publication. You will be notified when your proofs are ready to be viewed.

The ASM Journals program strives for constant improvement in our submission and publication process. Please tell us how we can improve your experience by taking this quick [Author Survey](#).

As an open-access publication, Spectrum receives no financial support from paid subscriptions and depends on authors' prompt payment of publication fees as soon as their articles are accepted. You will be contacted separately about payment when the proofs are issued; please follow the instructions in that e-mail. Arrangements for payment must be made before your article is published. For a complete list of **Publication Fees**, including supplemental material costs, please visit our [website](#).

ASM policy requires that data be available to the public upon online posting of the article, so please verify all links to sequence records, if present, and make sure that each number retrieves the full record of the data. If a new accession number is not linked or a link is broken, provide production staff with the correct URL for the record. If the accession numbers for new data are not publicly accessible before the expected online posting of the article, publication of your article may be delayed; please contact the ASM production staff immediately with the expected release date.

Corresponding authors may [join or renew ASM membership](#) to obtain discounts on publication fees. Need to upgrade your membership level? Please contact Customer Service at [Service@asmusa.org](mailto:Service@asmusa.org).

Thank you for submitting your paper to Spectrum.

Sincerely,

Kristen DeAngelis  
Editor, Microbiology Spectrum

Journals Department  
American Society for Microbiology  
1752 N St., NW  
Washington, DC 20036  
E-mail: [spectrum@asmusa.org](mailto:spectrum@asmusa.org)
